# Supplementary material for: Proline Isomerase Pin1 Represses Terminal Differentiation and Myocyte Enhancer Factor 2C Function in Skeletal Muscle Cells
Source: PubMed Central journal article supplement — J Biol Chem. 2010 Aug 27;285(45):34518–27. doi: 10.1074/jbc.M110.104133 (PMC2966067; doi:10.1074/jbc.m110.104133), 2010-08-27
Supplement: supp_M110.104133_Sup.pdf [file supp_M110.104133_Sup.pdf]

## Supplementary informations

Table S1

|                   | FORWARD                             | REVERSE                            |
|-------------------|-------------------------------------|------------------------------------|
| <b>S98A</b>       | CAATGGCTGTGACGCCCCAGATCCCG          | CGGGATCTGGGGCGTCACAGCCATTG         |
| <b>S110A</b>      | CAGTAGGTCACGCCCCCTGAGTCTGAG         | CTCAGACTCAGGGCGTGACCTACTG          |
| <b>S240A</b>      | GAATATACAAGCCAAAGCTCCTCCCCCTATGAATC | GATTCATAGGGGAGGAGCTTTGGCTTGTATATTC |
| <b>S388A</b>      | GTCAGAACCTGTTGCTCCTCCTAGAGACC       | GGTCTCTAGGAGGAGCAACAGGTTCTGAC      |
| <b>Δ1-57</b>      | CGATGACGACAAGCTTGCCAGCACTGACATGG    | CCATGTCAAGTCTGGCAAGCTTGTCTGTCATCG  |
| <b>Δ1-95</b>      | CGATGACGACAAGCTTAATGGCTGTGACAGCC    | GGCTGTCACAGCCATTAAGCTTGTCTGTCATCG  |
| <b>Δ1-173</b>     | CGATGACGACAAGCTTCCGTCTCTGCAGAGG     | CCTCTGCAGAGACGGAAGCTTGTCTGTCATCG   |
| <b>Δ247-327</b>   | CCTCACCAGGCCCTGCTGTTCAACACTGCCAGTG  | CACTGGCAGTGTGAACAGCAGGCCCTGGTGAGG  |
| <b>Δ1-327</b>     | CGATGACGACAAGCTTTCAACACTGCCAGTG     | CACTGGCAGTGTGAAAAGCTTGTCTGTCATCG   |
| <b>Δ92-400</b>    | GAGAAAAGGGCCTCTACCACAAACACACC       | GGTGTGTTGTGGGTAGAGGCCCTTCTTTCT     |
| <b>Pin1 C113A</b> | CTCACAGTTCAGCGACGCCAGCTCAGCCAAGGCC  | GGCCTTGGCTGAGCTGGCGTCGCTGAACTGTGAG |
| <b>Pin1 W34A</b>  | CATCACTAACGCCAGCCAGGCGGAGCGGCCAGC   | GCTGGGCCGCTCCGCTGGCTGGCGTTAGTGATG  |

### FIGURE LEGENDS

**Fig. S1. Pin1 isomerase activity is required to block skeletal muscle differentiation.** C2C7 myoblasts were infected with lentiviruses encoding HA-Pin1 or HA-Pin1 C113A, then induced to differentiate. (A) After 48h from serum withdrawal, cells were fixed and subjected to immunostaining using the anti-MyHC antibody (Red stain, upper panels), cell nuclei were stained by Hoechst (lower panels); bar: 50  $\mu$ m. (B) The proportion of nuclei in differentiated cells is reported as ratio between the nuclei incorporated in MyHC positive cells and total nuclei. The number obtained in cells that ectopically express the dominant negative Pin1 C113A is expressed relative to the number evaluated in cells that overexpress wild type Pin1 (taken as 1). The data are presented in the histogram and represent the mean of two independent experiments. (C) Western Blot (WB) analysis performed on protein extracts of C2C7 cells infected with lentiviruses encoding HA-Pin1 or HA-Pin1 C113A with antibodies against MyHC, Pin1 and actin.

**Fig. S2. The MEF2C region encompassing amino acids 92-118 is di-phosphorylated.** MALDI-TOF spectra of the MEF2C 92-118 peptide before (A) and after treatment (B) with Alkaline Phosphatase. The shift of +80 and +2(80) Da (2999.17 and 3079.17 versus 2919,17 Da peptide corresponding to the unmodified peptide) upon treatment of the tryptic digest with Alkaline Phosphatase (AP) strongly suggest that peaks  $m/z=2999.17$  and  $3079.79$  represent the mono- and di-phosphorylated peptide, respectively. Phosphorylated peaks are indicated with an arrow.

**Fig. S3. Multiple sequence alignment of MEF2 proteins.** Sequences of MEF2 proteins from different species were aligned with ClustalW ([www.ebi.ac.uk/Tools/clustalw](http://www.ebi.ac.uk/Tools/clustalw)). Serines 98 and 110 are conserved across MEF2 proteins from different species (MEF2A - rat gi:62078801; MEF2C - human gi:19923215; MEF2C - mouse gi:293728; MEF2C - dog gi:73952080; MEF2CB - zebrafish gi:195972877; MEF2A - human gi:5031907; MEF2A - mouse gi:76253934; MEF2A - zebrafish gi:18859003; MEF2A - chicken gi:45382367; MEF2D - mouse gi:19526812; MEF2D - human gi:5174545; MEF2D - rat gi:52138610; MEF2D - zebrafish gi:18859007).

**Fig. S4. Pin1 modulates MEF2C transcriptional activity.** C3H 10T1/2 cells were transfected with pGL3(desMEF2)<sub>3</sub>, pTK-Renilla and the empty plasmid expression vector pcDNA1/Amp or the vectors encoding HA-Pin1 (1  $\mu$ g) and MEF2C alone (100 ng) or in the indicated combinations. After 24 hours cells were lysed and luciferase reporter activity determined and normalized to Renilla activity. The data are presented as the fold activity versus that observed with the empty pcDNA1/Amp expression vector and

represent the mean  $\pm$  the standard deviation of the mean for three independent experiments. ( $p < 0,05$ ). A fraction of cell lysates were Western Blotted for anti-MEF2C (upper panel) or anti-Pin1 (lower panel).

**Fig. S5 Protein expression of cell cycle regulators upon Pin1 siRNA knockdown .** C2C7 myoblasts were infected with lentiviruses encoding short hairpin RNAs, respectively a scramble control sequence (sh CTRL, lane 1) or a Pin1 silencing sequence (sh Pin1, lane 2), then cultured in growth medium for 48h. Cell lysates from siRNA transfected cells were immunoblotted for the CDK inhibitor p21, Cyclin D1, MyHC, Pin1 and total actin.

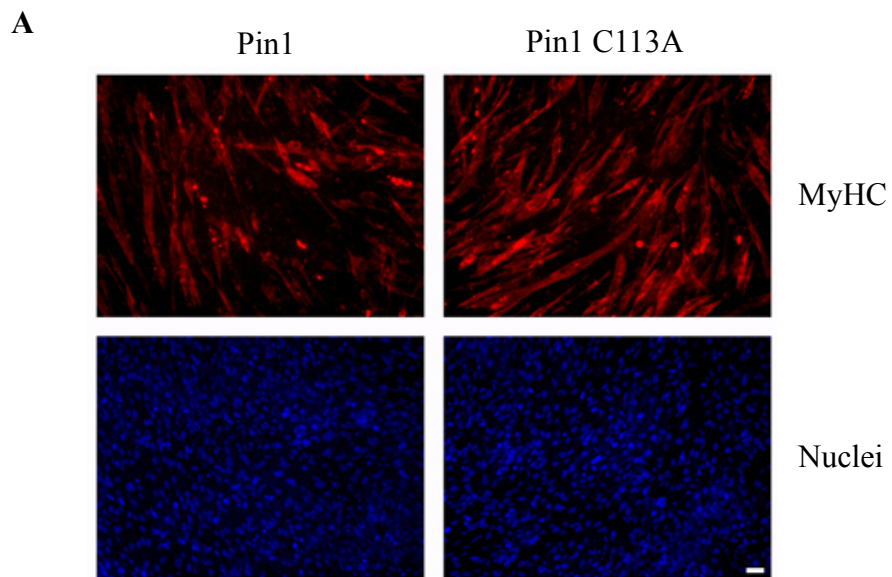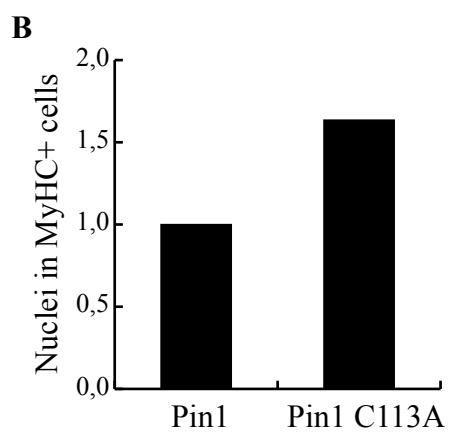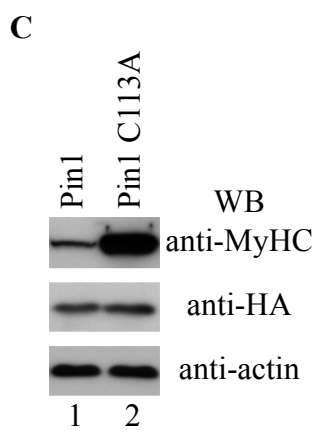

Figure S1

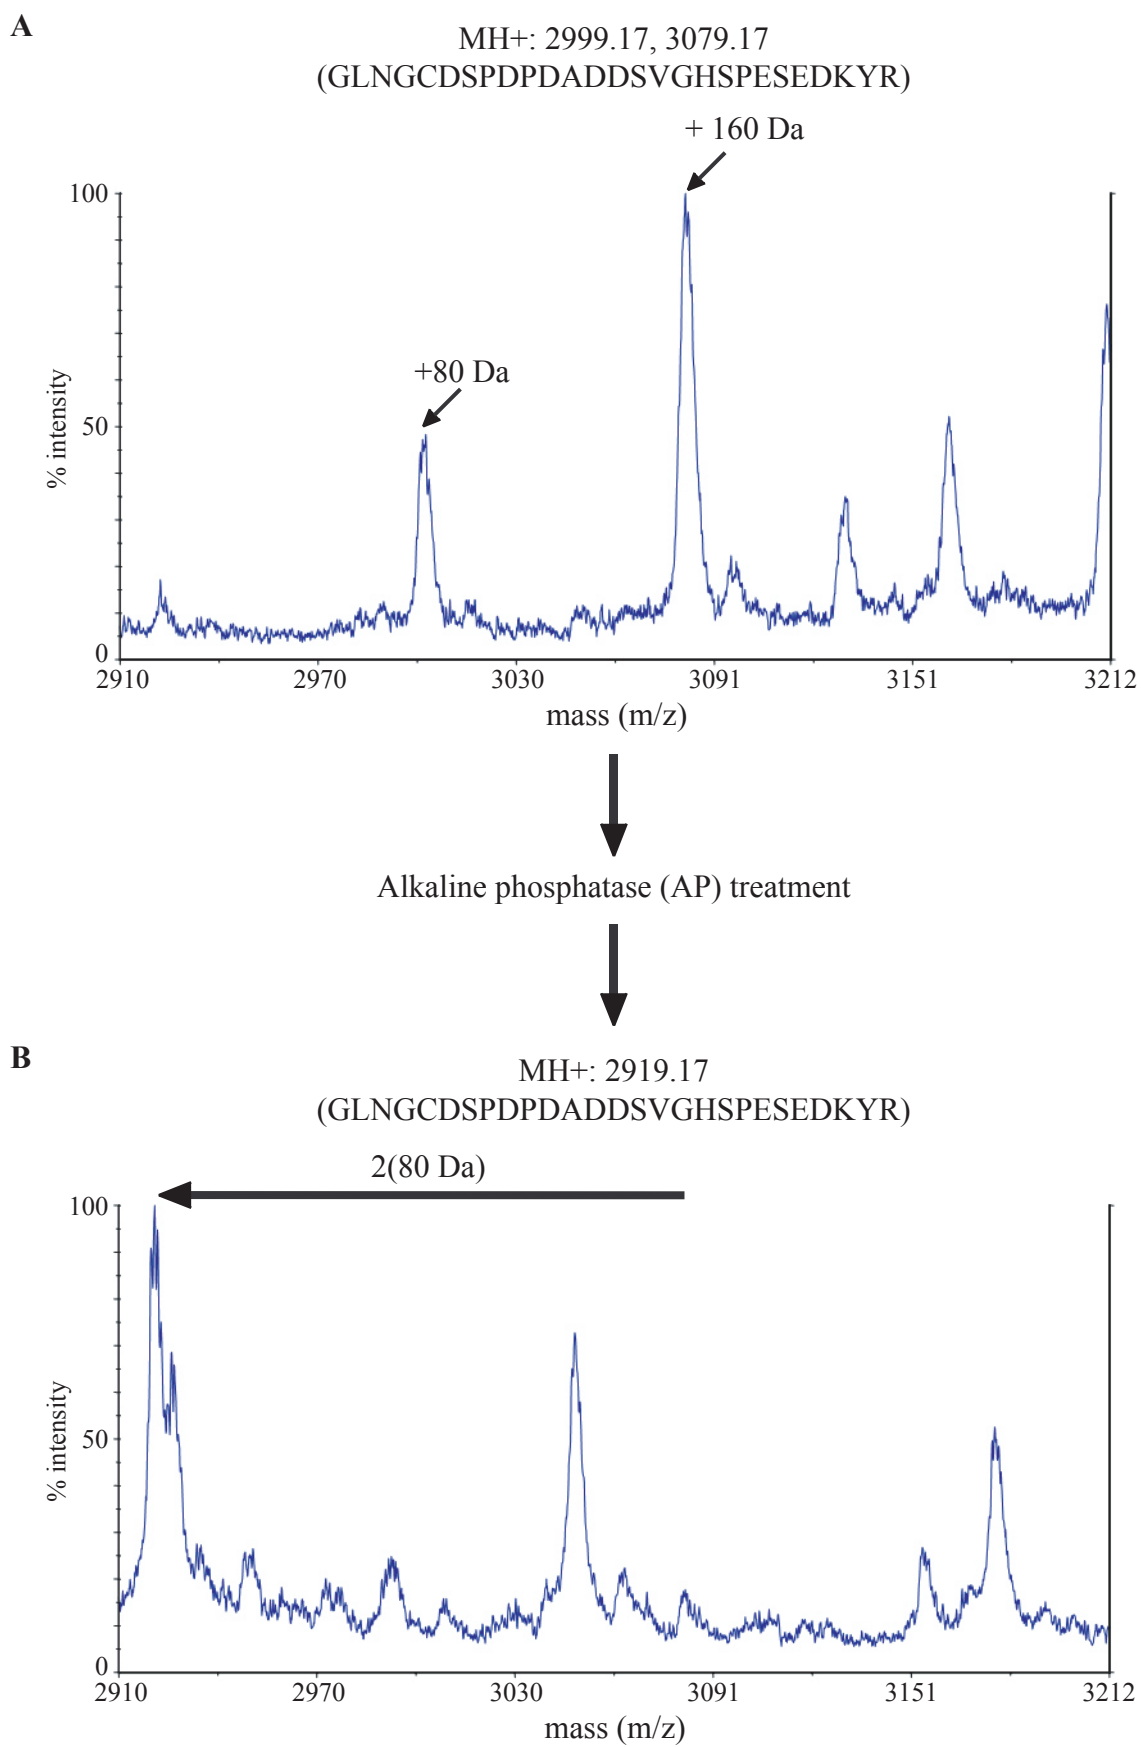

Figure S2

|                 |                                                     |               |     |
|-----------------|-----------------------------------------------------|---------------|-----|
| MEF2C_human     | DMDKVLLKYTEYNEPHESRTNSDIVETLRKKGLNGCDSPDPDADDSVGHSP | PESEDKYRKI    | 120 |
| MEF2C_dog       | DMDKVLLKYTEYNEPHESRTNSDIVETLRKKGLNGCDSPDPDADDSVGHSP | PESEDKYRKI    | 120 |
| MEF2C_mouse     | DMDKVLLKYTEYNEPHESRTNSDIVETLRKKGLNGCDSPDPDADDSVGHSP | PESEDKYRKI    | 120 |
| MEF2C_zebrafish | DMDKVLLKYTEYNEPHESRTNSDIVETLRKKGLNGCDSPDPDADDSVGHSP | ESKDKYREI     | 120 |
| MEF2A_rat       | DMDKVLLKYTEYNEPHESRTNSDIVEALNKKEHRGCDSPDP--DTSYVLT  | PHTEEKYKKI    | 118 |
| MEF2A_human     | DMDKVLLKYTEYNEPHESRTNSDIVEALNKKEHRGCDSPDP--DTSYVLT  | PHTEEKYKKI    | 118 |
| MEF2A_mouse     | DMDKVLLKYTEYNEPHESRTNSDIVETLRKKGLNGCDSPDA--DDYFEHS  | PLSEDRFSKL    | 118 |
| MEF2A_chicken   | DMDKVLLKYTEYNEPHESRTNSDIVETLRKKGLNGCDSPDA--DDYFEHS  | PLSEDRFSKL    | 118 |
| MEF2A_zebrafish | DMDKVLLKYTEYNEPHESRTNSDIVEKLRNKGHNDCPSDPDP--DDCFGHS | PLMDDRFGKL    | 118 |
| MEF2D_mouse     | DMDKVLLKYTEYNEPHESRTNADIETLRKKGFNGCDSPDPDGEDSLEQ    | SPLLEDKYRRA   | 120 |
| MEF2D_rat       | DMDKVLLKYTEYNEPHESRTNADIETLRKKGFNGCDSPDPDGEDSLEQ    | SPLLEDKYRRA   | 120 |
| MEF2D_human     | DMDKVLLKYTEYNEPHESRTNADIETLRKKGFNGCDSPDPDGEDSLEQ    | SPLLEDKYRRA   | 120 |
| MEF2D_zebrafish | DMDKVLLKYTEYNEPHESRTNADIEALNKKEHRDSESPDP--EFP       | SLTPRTEEKYKKI | 118 |

\*\*\*\*\*:\*\*\* \*.:\* ... \*\*: . : :\* .: .

**Figure S3**

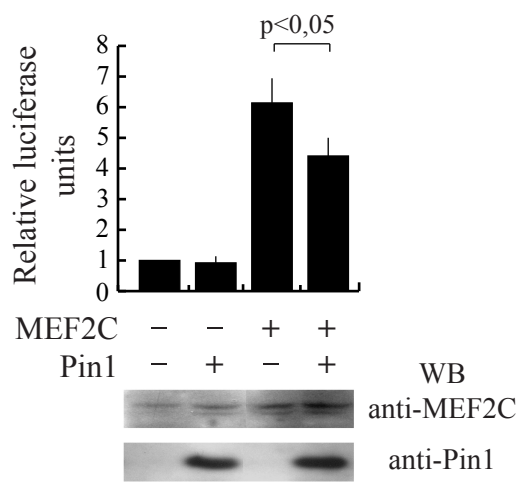

Figure S4

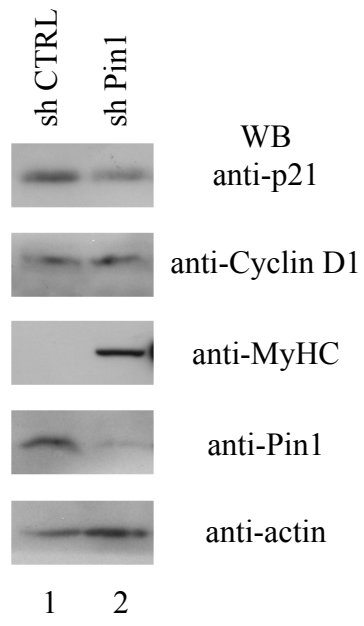

Figure S5
